# Supplementary material for: Dinuclearization strategy of cationic iridium(iii) complexes for efficient and stable flexible light-emitting electrochemical cells
Source: Royal Society of Chemistry journal article supplement (doi:10.1039/d2tc03539a), 2022-12-19
Supplement: d2tc03539a1.pdf [file d2tc03539a1.pdf]

## Electronic supplementary information (ESI)

### Dinuclearization Strategy of Cationic Iridium(III) Complexes for Efficient and Stable Flexible Light-Emitting Electrochemical Cells

Weilin Song,<sup>a, ‡</sup> Huiting Mao,<sup>a, e, ‡</sup> Kuizhan Shao,<sup>c</sup> Guogang Shan,<sup>\*c</sup> Ying Gao,<sup>\*a, b</sup>  
Qunying Zeng,<sup>\*d</sup> Fushan Li,<sup>d</sup> and Zhongmin Su,<sup>\*a, c</sup>

<sup>a</sup>College of Chemistry, Jilin University, Changchun, 130012, Jinlin, P. R. China.

E-mail: zmsu@nenu.edu.cn

<sup>b</sup>Jilin Provincial Key Laboratory of Straw Based Functional Materials, Institute for Interdisciplinary Biomass Functional Materials Studies, Jilin Engineering Normal University, Changchun, 130052, Jinlin, P. R. China. E-mail: gaoy029@163.com

<sup>c</sup>Institute of Functional Material Chemistry and National & Local United Engineering Lab for Power Battery, Faculty of Chemistry, Northeast Normal University, Changchun, 130024, Jinlin, P. R. China. Email: shangg187@nenu.edu.cn

<sup>d</sup>Institute of Optoelectronic Technology, Fuzhou University, Fuzhou 350002, PR of China. E-mail: qyzeng@fzu.edu.cn

<sup>e</sup>College of Life Science, Dalian Minzu University, Dalian, 116600, Liaoning, P. R. China

‡These authors contribute equally to this work.

## Table of Contents

1. **Experimental Section**
2. **Scheme S1.** Synthetic routes of **L1** and **L2**.
3. **Scheme S2.** Synthetic routes of **M-Ir1** and **D-Ir2**.
4. **Fig. S1.**  $^1\text{H}$  NMR spectrum of **M-Ir1** in  $d_6$ -DMSO.
5. **Fig. S2**  $^{13}\text{C}$  NMR spectrum of **M-Ir1** in  $d_6$ -DMSO.
6. **Fig. S3** Copy of the MALDI-TOF MS spectrum for **M-Ir1** (positive mode).
7. **Fig. S4**  $^1\text{H}$  NMR spectrum of **D-Ir2** in  $d_6$ -DMSO.
8. **Fig. S5**  $^{13}\text{C}$  NMR spectrum of **D-Ir2** in  $d_6$ -DMSO.
9. **Fig. S6** Copy of the MALDI-TOF MS spectrum for **D-Ir2** (positive mode).
10. **Fig. S7** 2D COSY NMR spectrum of complex **D-Ir2** in  $d_6$ -DMSO.
11. **Fig. S8** 2D NOESY NMR spectrum of complex **D-Ir2** in  $d_6$ -DMSO.
12. **Fig. S9** 2D HSQC NMR spectrum of complex **D-Ir2** in  $d_6$ -DMSO.
13. **Fig. S10** Hydrogen bonding, anion- $\pi$ , and intramolecular  $\text{CH}\cdots\pi$  interactions in the crystal structure of a) **M-Ir1** and b) **D-Ir2**.
14. **Fig. S11.** PL spectra of iridium(III) phosphors in  $\text{CH}_3\text{CN}$  ( $10^{-5}$  M) at 77 K.
15. **Fig. S12.** Electron density difference maps (EDDMs) of the lowest energy singlet-triplet electronic transition of all complexes in their lowest-lying triplet state geometries. Blue indicates a decrease in charge density, while green indicates an increase.
16. **Fig. S13.** The  $\pi$ - $\pi$  interactions in the crystal structure of a) **M-Ir1** and b) **D-Ir2**.
17. **Fig. S14.** Emission lifetime decay curves recorded in  $\text{CH}_3\text{CN}$  solution with a concentration of  $10^{-5}$  M and thin films at room temperature.
18. **Fig. S15.** The energy level diagrams and spin-orbit coupling (SOC) constant for **M-Ir1** and **D-Ir2**.
19. **Fig. S16.** Cyclic voltammograms of complexes **M-Ir1** and **D-Ir2** in acetonitrile solution ( $10^{-3}$  M).

20. **Fig. S17.** Lifetime test of devices based on a) **M-Ir1-Glass** and **D-Ir2-Glass**, b) **M-Ir1-PET** and **D-Ir2-PET** under a constant current density of 5 mA cm<sup>-2</sup>. c) Statistical histogram of a lifetime for rigid and flexible devices based on **M-Ir1** and **D-Ir2** under a constant current density of 5 mA cm<sup>-2</sup>.
21. **Table S1.** Crystal Data and Structure Refinement for **M-Ir1** and **D-Ir2**
22. **Table S2.** Calculated energy levels, transition nature of the lowest triplet excited state (T<sub>1</sub>) of all phosphors
- Coordinates of all optimized geometrical structures

## Experimental Section

### Materials and solvents

The 2-(pyridin-2-yl)-1*H*-benzo[*d*]imidazole, iodobenzene, 18-Crown-6, CuI, K<sub>2</sub>CO<sub>3</sub>, KOH, and DMPU were used as purchased. All other chemicals were analytical grade reagent and dried according to standard procedures. All air-sensitive reactions were carried out under an argon atmosphere. The cyclometalated iridium(III)  $\mu$ -chlorobridged dimers of (dfppz)<sub>2</sub>Ir( $\mu$ -Cl)<sub>2</sub>(dfppz)<sub>2</sub> was prepared as previously described.

### Synthesis and characterization

Flash chromatography was performed by using silica gel 60 (200-300 mesh, HAIYANG). Analytical thin layer chromatography (TLC) was performed by using aluminum coated silica gel 60 F254 plates (Leading Chem). The NMR spectra were recorded on a Bruker Avance 500 (<sup>1</sup>H: 500 MHz; <sup>13</sup>C: 150 MHz) with tetramethylsilane (TMS) as an internal standard. The coupling constants (*J*) and chemical shifts ( $\delta$ ) are expressed in Hz and ppm, respectively. Multiplicities are denoted as follows: s=singlet, d=doublet, t=triplet, m=multiplet. Mass spectra data was measured on matrix-assisted laser desorption-ionization time-of-flight (MALDI-TOF) mass spectrometry.

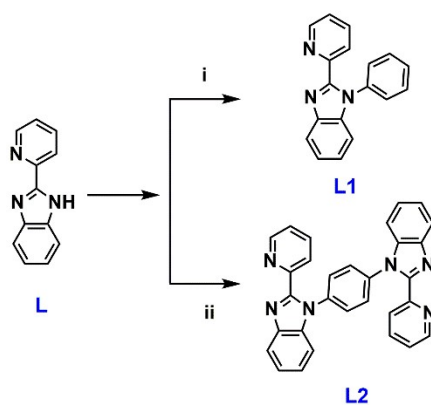

**Scheme S1.** Synthetic routes of L1 and L2. (i) (ii) L, C<sub>6</sub>H<sub>5</sub>I, K<sub>2</sub>CO<sub>3</sub>, CuI, 18-crown-6, DMPU, 190°C.

### Synthetic route of L1.

A mixture of 2-(pyridin-2-yl)-1*H*-benzo[*d*]imidazole (0.43 g, 2.2 mmol), iodobenzene (0.41 g, 2.0 mmol), 18-Crown-6 (0.05 g, 0.2 mmol), CuI (0.05 g, 0.2 mmol) and K<sub>2</sub>CO<sub>3</sub> (0.41 g, 3.0 mmol) in DMPU (5 mL) was heated at 190°C under nitrogen for 12 h. After cooling to room temperature, the reaction mixture was diluted with a saturated aqueous NaCl solution, then extracted with dichloromethane. The combined organic extracts were dried over anhydrous Na<sub>2</sub>SO<sub>4</sub> and concentrated under reduced pressure. The crude product was purified by column chromatography on silica gel eluting with dichloromethane and petroleum ether in volumetric ratio 10:1. A white solid was isolated in 80% yield. <sup>1</sup>H NMR (500 MHz, CDCl<sub>3</sub>, δ [ppm]): 8.39 (d, *J* = 4.5 Hz, 1H), 8.07 (d, *J* = 8.0 Hz, 1H), 7.92 (d, *J* = 8.0 Hz, 1H), 7.72-7.76 (m, 1H), 7.43-7.50 (m, 3H), 7.28-7.38 (m, 4H), 7.21-7.26 (m, 2H).

### Synthetic route of L2

The reaction was carried out according to the procedure described for the synthesis of L1, using the following amounts of reagents: 1,4-dibromobenzene (0.24 g, 1.0 mmol), 2-(pyridin-2-yl)-1*H*-benzo[*d*]imidazole (0.43 g, 2.2 mmol), 18-Crown-6 (0.05 g, 0.2 mmol), CuI (0.05 g, 0.2 mmol), K<sub>2</sub>CO<sub>3</sub> (0.41 g, 3.0 mmol) and DMPU (5 mL). <sup>1</sup>H NMR (500 MHz, CDCl<sub>3</sub>, δ [ppm]): 8.45 (d, *J* = 4.5 Hz, 2H), 8.27 (d, *J* = 7.0 Hz, 2H), 7.97 (d, *J* = 7.5 Hz, 2H), 7.84 (t, *J* = 7.5 Hz, 2H), 7.46 (s, 4H), 7.37-7.43 (m, 4H), 7.30-7.34 (m, 4H).

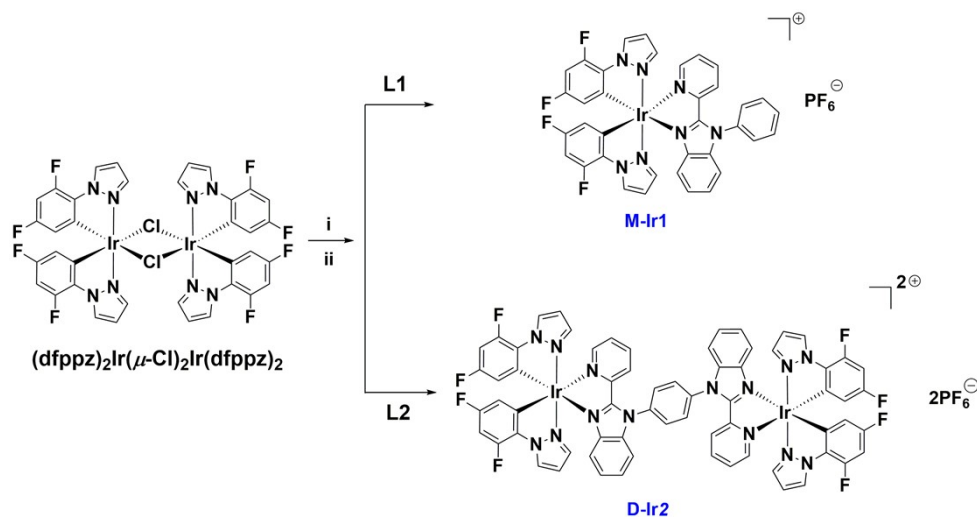

**Scheme S2.** Synthetic routes of **M-Ir1** and **D-Ir2**. (i) **L1**, **L2**, **L3**, or **L4**, ethylene glycol, 150°C, 12 h; (ii) aqueous NH<sub>4</sub>PF<sub>6</sub> solution.

***Synthetic route of complexes***

The prior synthesized chloro-bridge di-iridium intermediate complex [(dfppz)<sub>2</sub>Ir(μ-Cl)]<sub>2</sub> and the respective ancillary N<sup>N</sup> ligands **L1** and **L2** were transferred into a flask. Ethylene glycol was added via a cannula and the reaction mixture heated under reflux at 150°C for 24 h, to give a clear solution. After cooling to room temperature, the solution was transferred to another flask. An aqueous solution of NH<sub>4</sub>PF<sub>6</sub> (2 g, 12.3 mmol) was added to the mixture resulting in an immediate precipitation of the desired product complex. The mixture was filtered and the residue was purified by column chromatography, using a dichloromethane:ethyl acetate (10:1) mixture to elude the desired purified complexes. Eluant was distilled off leading to slow precipitation crystallization of pure complexes. The purified complexes were then dried under vacuum.

**M-Ir1:** [(dfppz)<sub>2</sub>Ir(μ-Cl)]<sub>2</sub> (0.6 g, 0.5 mmol), **L1** (0.27 g, 1.0 mmol), ethylene glycol (20 mL). Yellow powder (yield: 62%). <sup>1</sup>H NMR (500 MHz, *d*<sub>6</sub>-DMSO) δ 8.68 (d, *J* = 2.7 Hz, 1H), 8.65 (d, *J* = 2.7 Hz, 1H), 8.15 (d, *J* = 4.9 Hz, 1H), 8.08 (td, *J* = 8.0, 1.6 Hz, 1H), 7.99 – 7.92 (m, 1H), 7.91 – 7.84 (m, 4H), 7.68 – 7.59 (m, 2H), 7.50 – 7.42 (m, 2H), 7.29 (ddd, *J* = 8.3, 7.3, 1.0 Hz, 1H), 7.26 – 7.19 (m, 2H), 7.15 (dd, *J* = 13.3, 8.6 Hz, 2H), 6.81 (dt, *J* = 4.2, 2.7 Hz, 2H), 6.46 (d, *J* = 8.4 Hz, 1H), 5.79 (dd, *J* = 8.0, 2.4 Hz, 1H), 5.69 (dd, *J* = 8.0, 2.5 Hz, 1H). <sup>13</sup>C NMR (125 MHz, *d*<sub>6</sub>-DMSO, ppm): δ 152.82, 152.78, 150.1, 150.0, 149.8, 149.7, 148.04, 148.0, 147.8, 147.7, 147.1, 140.7, 140.4, 140.3, 139.8, 138.4, 137.9, 134.73, 134.69, 134.2, 133.0, 132.9, 132.7, 132.6, 132.0, 131.5, 131.4, 129.3, 128.9, 128.6, 127.8, 127.68, 127.65, 127.6, 127.0, 126.2, 125.1, 116.7, 115.8, 115.6, 115.0, 114.8, 113.1, 110.03, 109.96, 100.3, 100.2, 100.11, 100.08, 100.01, 100.0, 99.9, 99.8. MS (MALDI-TOF) *m/z*: Calcd for C<sub>36</sub>H<sub>23</sub>F<sub>4</sub>IrN<sub>7</sub>: 822.2, Found 822.2 [M]<sup>+</sup>.

**D-Ir2:** [(dfppz)<sub>2</sub>Ir(μ-Cl)]<sub>2</sub> (0.59 g, 0.5 mmol), **L2** (0.21 g, 0.45 mmol), ethylene glycol (20 mL). Yellow powder (yield: 66%). <sup>1</sup>H NMR (500 MHz, *d*<sub>6</sub>-DMSO) δ 8.74

– 8.64 (m, 4H), 8.39 (dd,  $J = 8.2, 5.3$  Hz, 4H), 8.21 (dt,  $J = 13.0, 7.6$  Hz, 4H), 7.79 – 7.53 (m, 9H), 7.51 – 7.33 (m, 5H), 7.31 – 7.23 (m, 2H), 7.19 (ddt,  $J = 11.6, 9.2, 2.3$  Hz, 2H), 6.83 (ddt,  $J = 8.8, 5.3, 2.7$  Hz, 4H), 6.51 (td,  $J = 8.3, 3.9$  Hz, 2H), 5.80 (dd,  $J = 7.9, 2.2$  Hz, 2H), 5.71 (d,  $J = 7.7$  Hz, 2H).  $^{13}\text{C}$  NMR (125 MHz,  $d_6$ -DMSO, ppm):  $\delta$  152.99, 152.96, 152.8, 150.1, 150.0, 149.9, 149.7, 148.1, 148.0, 147.8, 147.7, 146.9, 140.74, 140.70, 140.6, 140.3, 140.2, 139.9, 139.8, 138.2, 138.1, 137.8, 136.6, 136.5, 134.6, 134.5, 133.1, 133.0, 132.8, 132.7, 131.8, 131.7, 131.6, 131.5, 129.6, 127.9, 127.7, 127.3, 127.1, 126.5, 125.6, 116.8, 115.8, 115.6, 115.0, 114.8, 113.7, 113.6, 110.1, 100.0, 100.4, 100.3, 100.20, 100.16, 100.0, 99.9. MS (MALDI-TOF)  $m/z$ : Calcd for  $\text{C}_{66}\text{H}_{40}\text{F}_8\text{Ir}_2\text{N}_{14}$  1566.2, Found 1711.2 (M-PF<sub>6</sub>).

### Single Crystal X-Ray Diffraction Analysis

Single crystal of complexes **M-Ir1** and **D-Ir2** were obtained by solvent diffusion method (from methanol to dichloromethane). The crystals were mounted on glass fiber and the data were collected on a Bruker Apex CCD II area-detector diffractometer. The structure was solved with the ShelXT structure solution program using the Intrinsic Phasing solution method and by using Olex2 as the graphical interface. Further details of the crystal structure determination have been deposited to the Cambridge Crystallographic Data Centre as supplementary publication. CCDC 2122653 (**M-Ir1**) and 2122652 (**D-Ir2**) contain the supplementary crystallographic data for this paper.

### Theoretical Calculations

Theoretical calculations were carried out by using the Gaussian 09 program package. The optimization of the geometries of ground ( $S_0$ ) and excited ( $T_1$ ) states of the iridium(III) complexes **M-Ir1** and **D-Ir2** were carried out using density functional theory (DFT) at the B3LYP level. The ground-state structures were optimized based on their corresponding single crystal structures. The iridium(III) atom was calculated by the Double- $\xi$  quality basis set containing LANL2DZ, while a 6-31G\*\* basis set was employed for C, H, N atoms. Solvent effects were considered by using the polarized continuum model (PCM) approach. The spin-orbit coupling constants of **M-Ir1** and

**D-Ir2** were calculated using ORCA 5.0.2 under the conductor-like polarizable continuum model (C-PCM) in the Acetonitrile solvent with B3LYP functional and ZORA-def2-TZVP basis set.

### **Photophysical characterization**

UV-vis absorption and Photoluminescent spectra of these complexes were measured at room temperature on a Cary 500 UV-Vis-NIR spectrophotometer and FL-4600 FL spectrophotometer in CH<sub>3</sub>CN, respectively. In addition, the excited-state lifetimes and photoluminescence quantum yields (PLQYs) were monitored by an Edinburgh FLSP920 spectrofluorimeter. Absolute photoluminescence quantum efficiency at room temperature was measured using an integrating sphere.

### **Electrochemical characterization**

Cyclic voltammetry was performed on an electrochemical workstation (BAS100W instrument) in CH<sub>3</sub>CN solutions ( $1 \times 10^{-3}$  M) at a scan rate of 100 mV s<sup>-1</sup> using a glassy-carbon electrode as the working electrode, an aqueous saturated calomel electrode as the reference electrode, and a platinum-wire electrode as the auxiliary electrode. Tetrabutylammonium hexafluorophosphate ( $1 \times 10^{-1}$  M) and ferrocene was selected as the supporting electrolyte and internal standard, respectively.

### **Device preparation**

The rigid ITO/glass substrates and flexible ITO/PET substrates with a sheet resistance of  $25 \pm 5 \Omega/\text{sq}$  and  $400 \pm 20 \Omega/\text{sq}$ , respectively, were sonicated in acetone, ethanol, and deionized water for 30 min and then dried in an oven. The iridium(III) complexes were dissolved in CH<sub>3</sub>CN solutions at 20 mg/ml. BMIM-PF<sub>6</sub> were dissolved in CH<sub>3</sub>CN solutions at 10 mg/ml. To improve the wettability, plasma treatment of ITO was performed for 1 min. A thin film of PEDOT:PSS was spin-coated onto ITO/glass substrates and baked at 120°C for 30 min. Then, the emissive layer of LEC was spin-coated on the top of the PEDOT:PSS layer. After spin-coating the emissive layers, the samples were baked at 70°C for 1 h in a nitrogen glove box. Finally, an aluminum cathode was thermally evaporated in a vacuum chamber below  $3 \times 10^{-3}$  Pa. The EL spectra of the LECs were measured using a Hitachi F-4600 fluorescence



spectrophotometer. The electrical and emission characteristics of the LECs were recorded with a Keithley 4200 semiconductor characterization system. The luminance was employed using a Topcon SR-3A spectroradiometer. The flexible devices were not encapsulated and were characterized inside the glovebox.

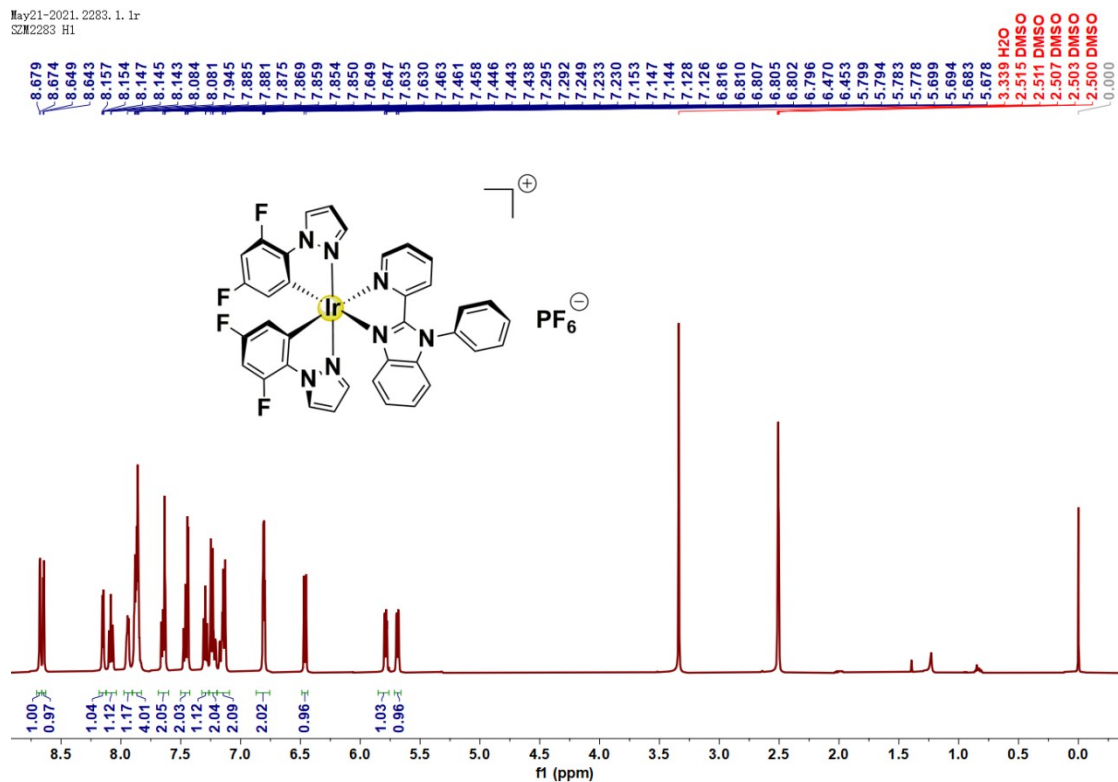

**Fig. S1.**  $^1\text{H}$  NMR spectrum of **M-Ir1** in  $d_6$ -DMSO.

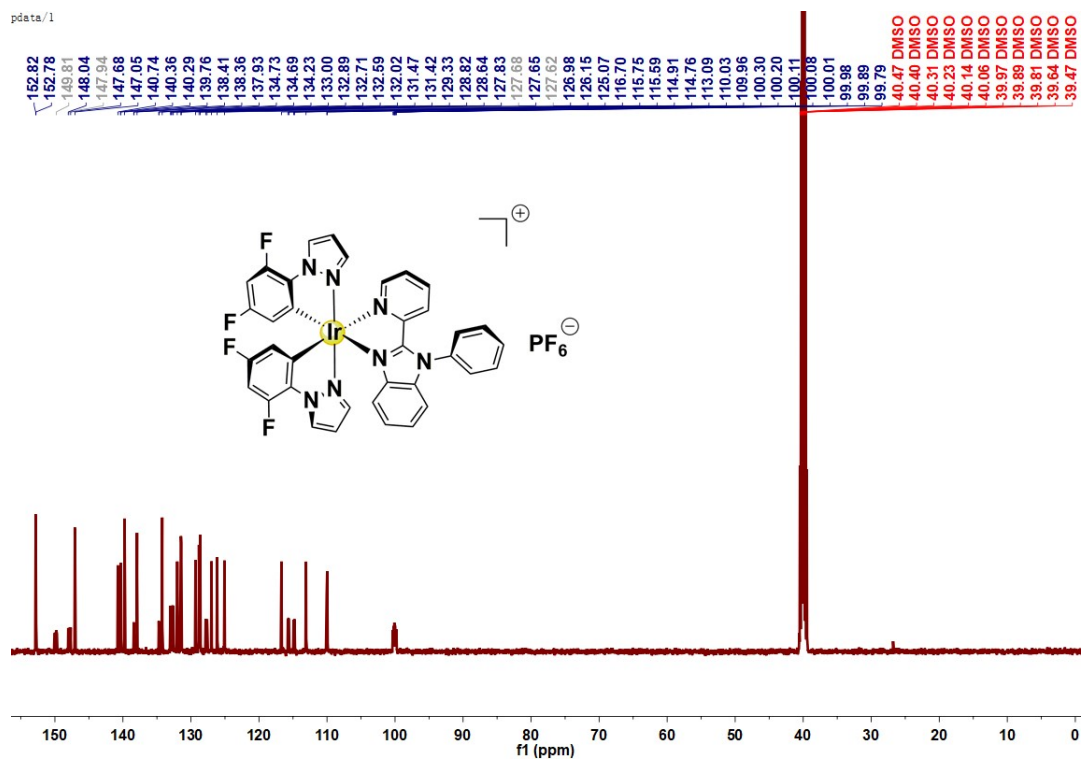

**Fig. S2.**  $^{13}\text{C}$  NMR spectrum of **M-Ir1** in  $d_6$ -DMSO.

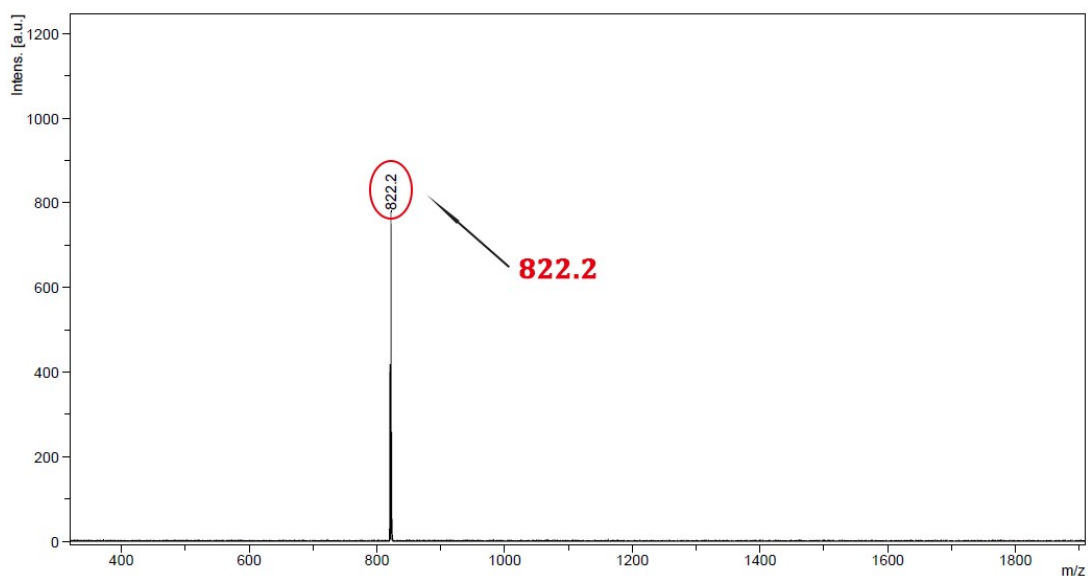

**Fig. S3.** Copy of the MALDI-TOF MS spectrum for **M-Ir1** (positive mode).

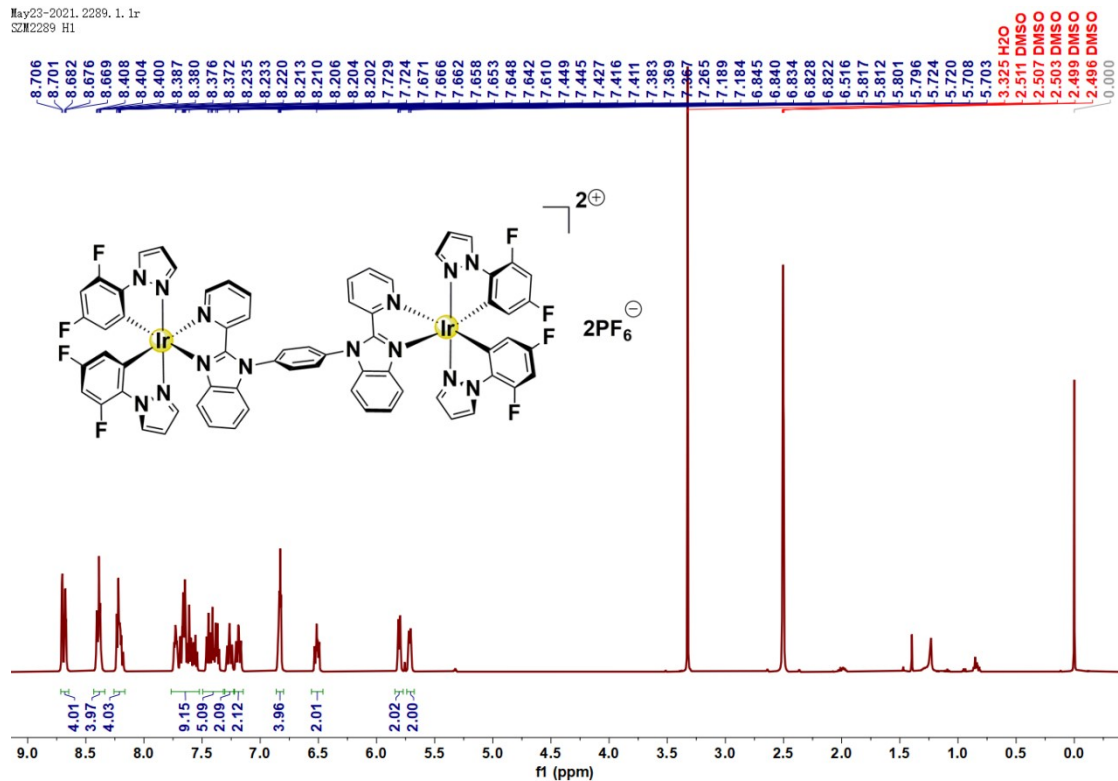

Fig. S4.  $^1H$  NMR spectrum of **D-Ir2** in  $d_6$ -DMSO.

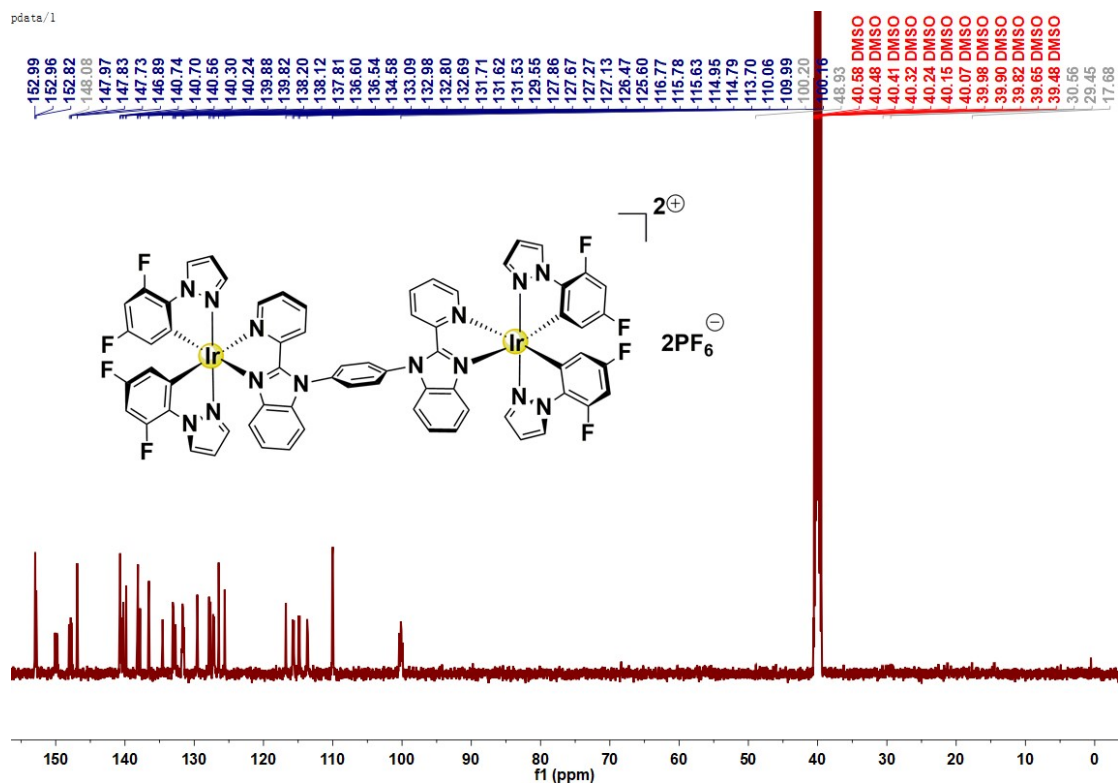

Fig. S5.  $^{13}C$  NMR spectrum of **D-Ir2** in  $d_6$ -DMSO.

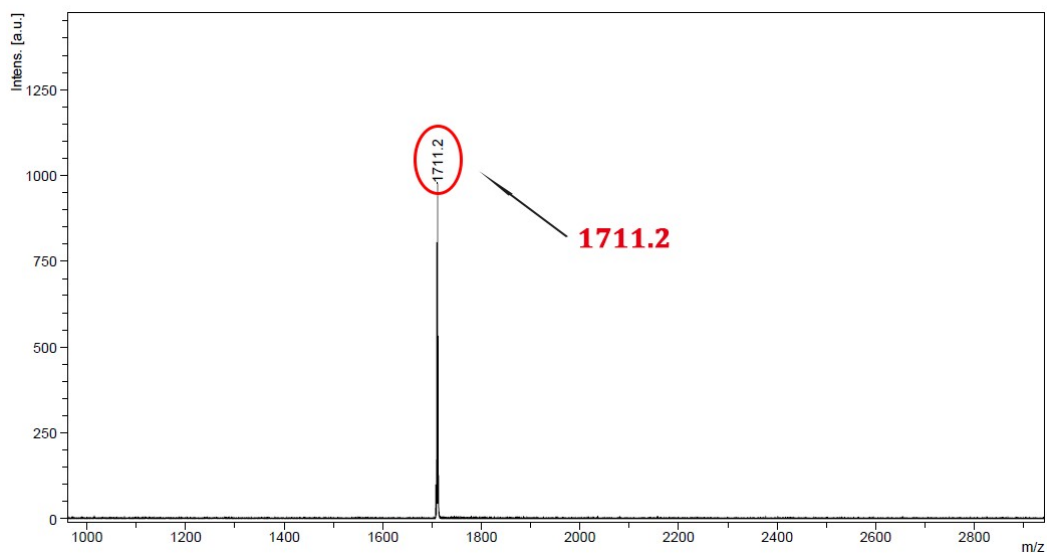

**Fig. S6.** Copy of the MALDI-TOF MS spectrum for **D-Ir2** (positive mode).

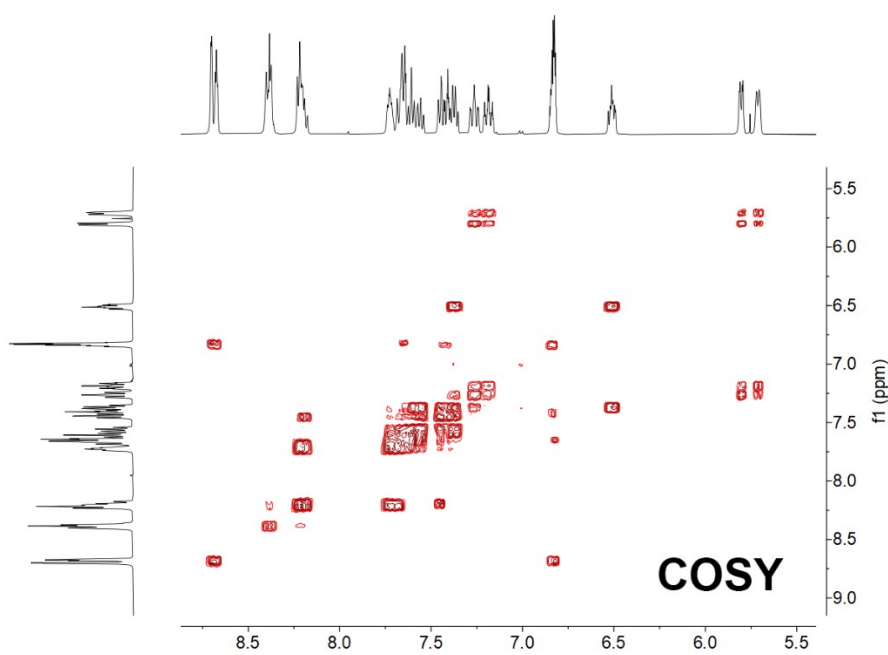

**Fig. S7.** 2D COSY NMR spectrum of complex **D-Ir2** in  $d_6$ -DMSO.

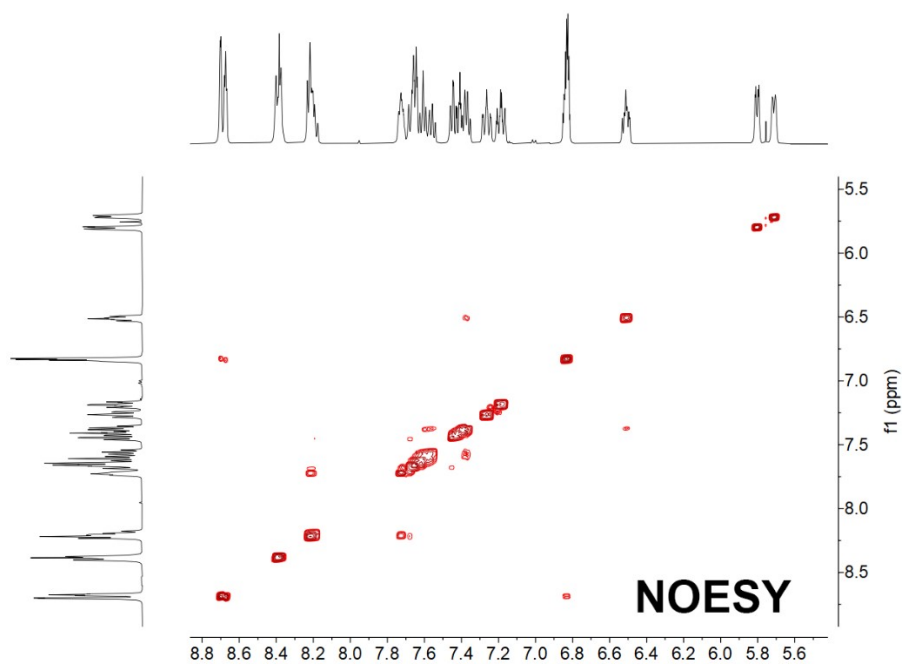

**Fig. S8.** 2D NOESY NMR spectrum of complex **D-Ir2** in  $d_6$ -DMSO.

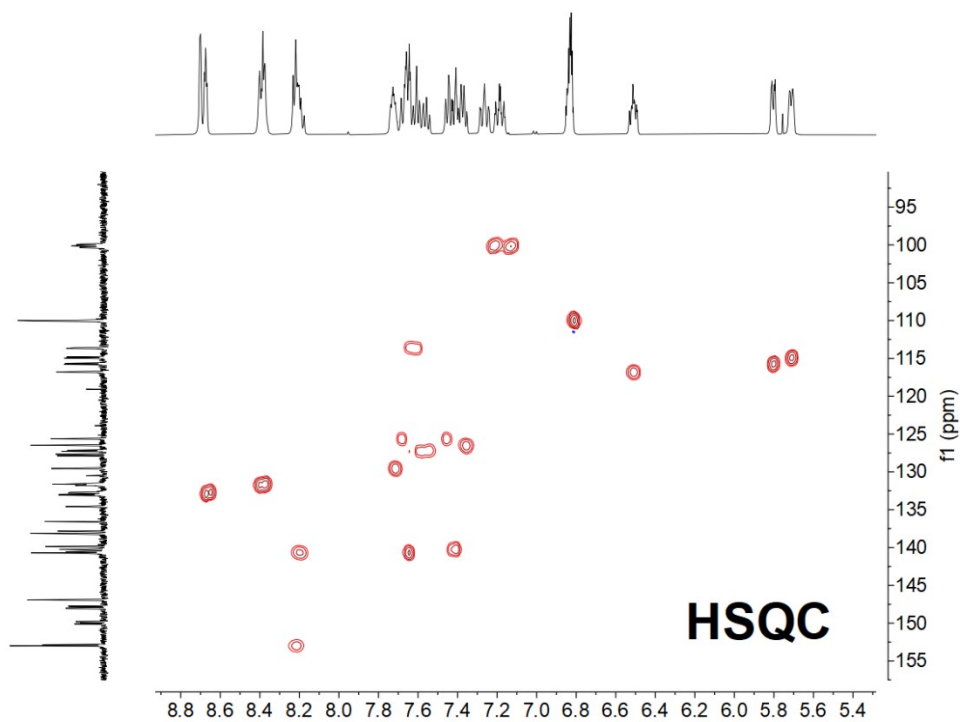

**Fig. S9.** 2D HSQC NMR spectrum of complex **D-Ir2** in  $d_6$ -DMSO.

**Table S1.** Crystal Data and Structure Refinement for **M-Ir1** and **D-Ir2**

|                                                                      | <b>M-Ir1</b>                                                       | <b>D-Ir2</b>                                                                                   |
|----------------------------------------------------------------------|--------------------------------------------------------------------|------------------------------------------------------------------------------------------------|
| Empirical formula                                                    | C <sub>36</sub> H <sub>23</sub> F <sub>10</sub> IrN <sub>7</sub> P | C <sub>66</sub> H <sub>40</sub> F <sub>20</sub> Ir <sub>2</sub> N <sub>14</sub> P <sub>2</sub> |
| Formula weight                                                       | 966.78                                                             | 1815.64                                                                                        |
| Temperature (K)                                                      | 173.0                                                              | 173.01                                                                                         |
| Crystal system                                                       | Triclinic                                                          | Triclinic                                                                                      |
| space group                                                          | P-1                                                                | P-1                                                                                            |
| a/Å                                                                  | 10.9140(4)                                                         | 10.5106(4)                                                                                     |
| b/Å                                                                  | 13.7335(5)                                                         | 17.8993(7)                                                                                     |
| c/Å                                                                  | 16.7474(6)                                                         | 20.5010(8)                                                                                     |
| α/°                                                                  | 67.455(2)                                                          | 86.048(2)                                                                                      |
| β/°                                                                  | 88.131(2)                                                          | 79.912(2)                                                                                      |
| γ/°                                                                  | 73.286(2)                                                          | 84.680(2)                                                                                      |
| V/Å <sup>3</sup>                                                     | 2211.87(14)                                                        | 3775.5(3)                                                                                      |
| Z                                                                    | 2                                                                  | 2                                                                                              |
| ρ calc (g/cm <sup>3</sup> )                                          | 1.452                                                              | 1.597                                                                                          |
| μ/mm <sup>-1</sup>                                                   | 6.847                                                              | 7.992                                                                                          |
| R <sub>int</sub>                                                     | 0.0526                                                             | 0.0416                                                                                         |
| Goodness of fit on F <sup>2</sup>                                    | 1.042                                                              | 1.031                                                                                          |
| R <sub>1</sub> <sup>a</sup> , wR <sub>2</sub> <sup>b</sup> [I>2σ(I)] | 0.0911, 0.2145                                                     | 0.0473, 0.1188                                                                                 |
| R <sub>1</sub> , wR <sub>2</sub> (all data)                          | 0.1093, 0.2283                                                     | 0.0582, 0.1256                                                                                 |

<sup>a</sup>  $R_1 = \frac{\sum ||F_o| - |F_c||}{\sum |F_o|}$ . <sup>b</sup>  $wR_2 = \left\{ \frac{\sum [w(F_o^2 - F_c^2)^2]}{\sum [w(F_o^2)^2]} \right\}^{1/2}$

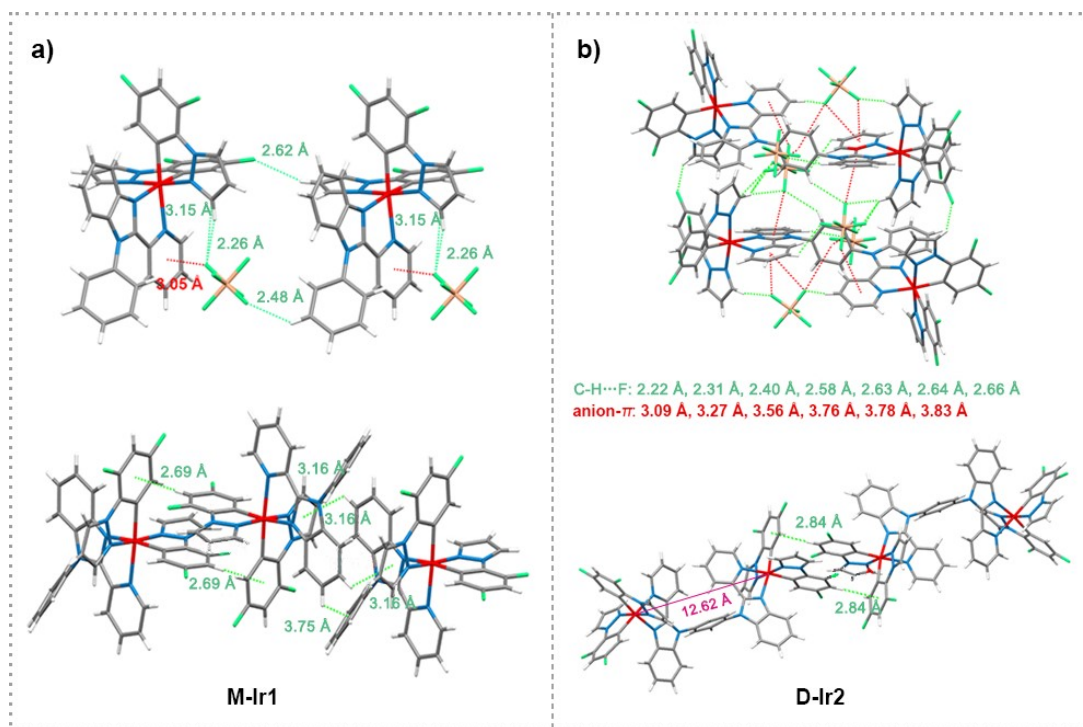

**Fig. S10.** Hydrogen bonding, anion- $\pi$ , and intramolecular  $\text{CH}\cdots\pi$  interactions in the crystal structure of a) **M-Ir1** and b) **D-Ir2**.

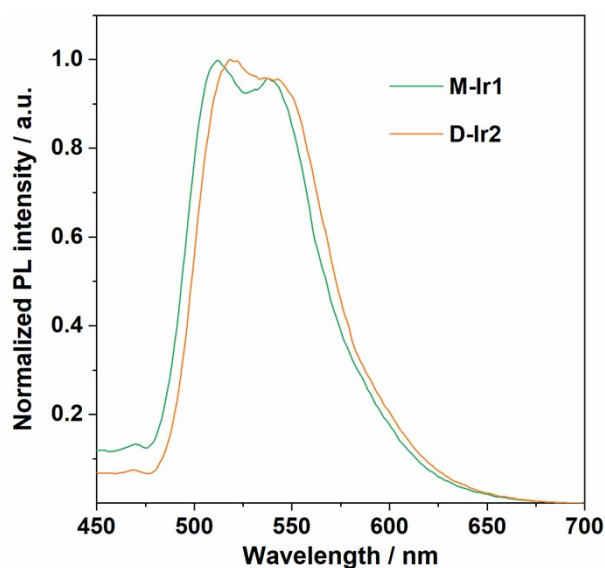

**Fig. S11.** PL spectra of iridium(III) phosphors in  $\text{CH}_3\text{CN}$  ( $10^{-5}$  M) at 77 K.

**Table S2.** Calculated energy levels, transition nature of the lowest triplet excited state ( $T_1$ ) of all phosphors

| Phosphors    | State          | eV   | Assignment        | Character <sup>a</sup>             |
|--------------|----------------|------|-------------------|------------------------------------|
| <b>MIr-1</b> | T <sub>1</sub> | 2.17 | HOMO-1→LUMO (90%) | <sup>3</sup> LC/ <sup>3</sup> MLCT |
| <b>DIr-2</b> | T <sub>1</sub> | 2.10 | HOMO-2→LUMO (87%) | <sup>3</sup> LC/ <sup>3</sup> MLCT |

<sup>a</sup> MLCT and ILCT denote metal to ligand charge transfer and intraligand charge transfer, respectively.

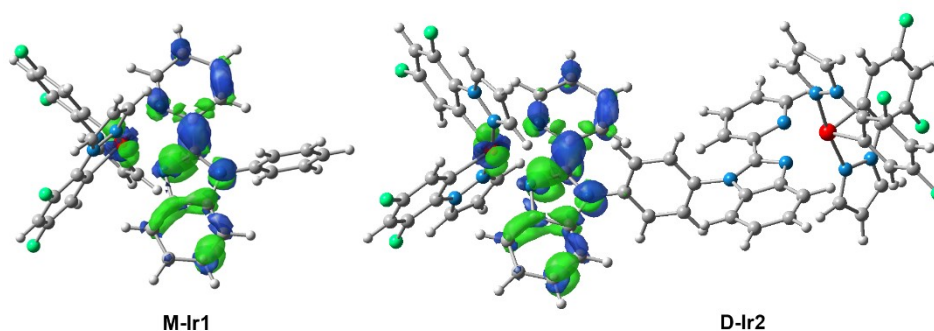

**Fig. S12.** Electron density difference maps (EDDMs) of the lowest energy singlet-triplet electronic transition of all complexes in their lowest-lying triplet state geometries. Blue indicates a decrease in charge density, while green indicates an increase.

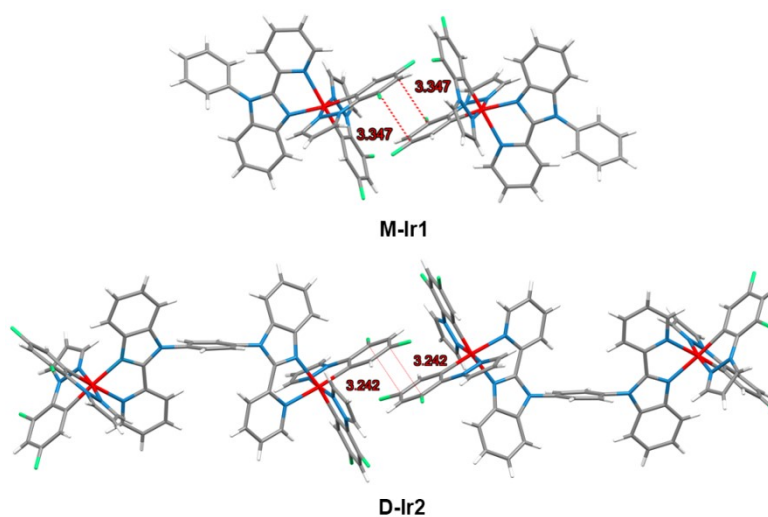

**Fig. S13.** The  $\pi$ - $\pi$  interactions in the crystal structure of a) **M-Ir1** and b) **D-Ir2**.



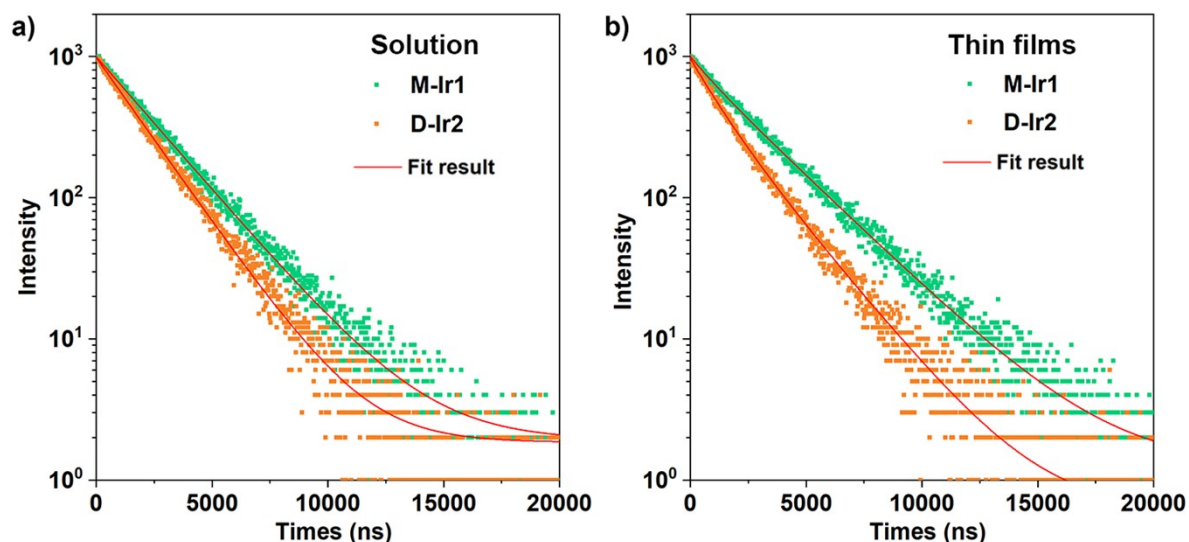

**Fig. S14.** Emission lifetime decay curves recorded in  $\text{CH}_3\text{CN}$  solution with a concentration of  $10^{-5}$  M and thin films at room temperature.

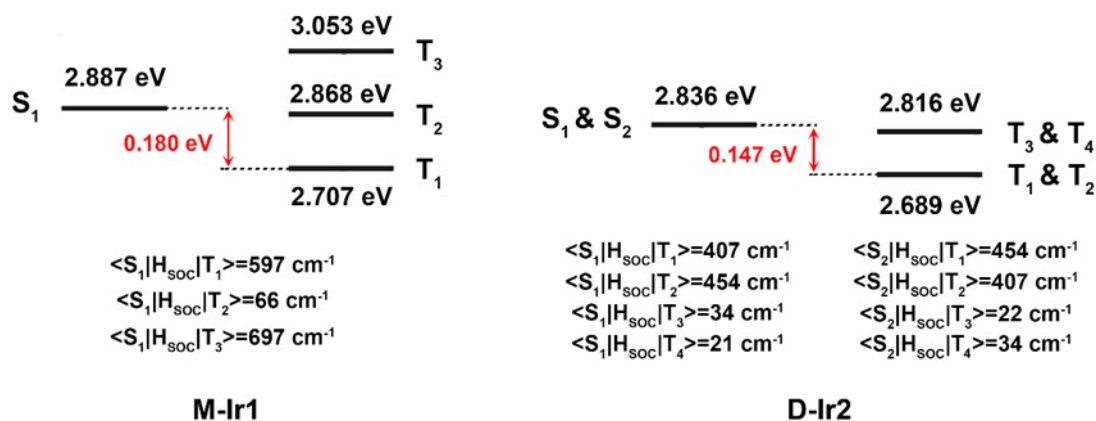

**Fig. S15.** The energy level diagrams and spin-orbit coupling (SOC) constant for **M-Ir1** and **D-Ir2**.

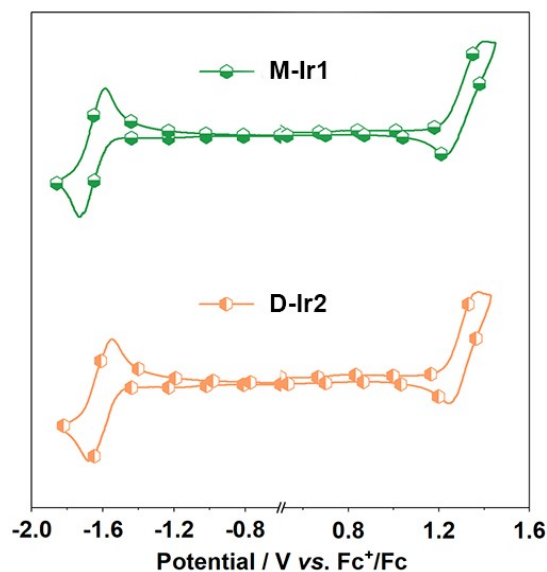

**Fig. S16.** Cyclic voltammograms of complexes **M-Ir1** and **D-Ir2** in acetonitrile solution ( $10^{-3}$  M).

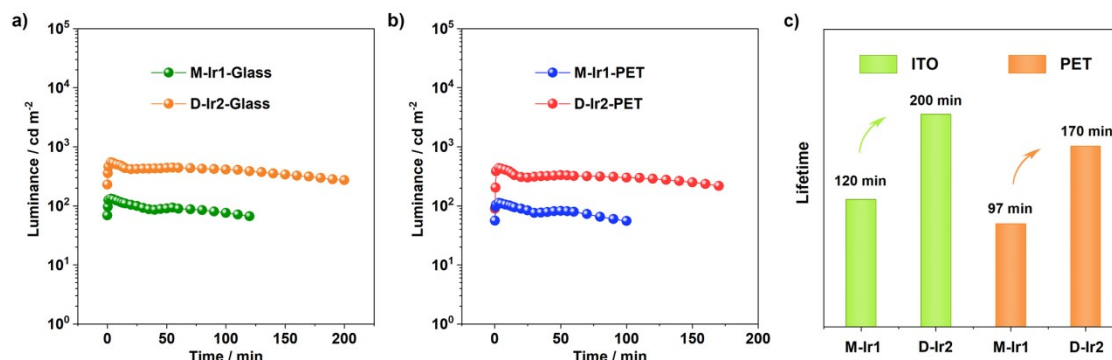

**Fig. S17.** Lifetime test of devices based on a) **M-Ir1-Glass** and **D-Ir2-Glass**, b) **M-Ir1-PET** and **D-Ir2-PET** under a constant current density of  $5 \text{ mA cm}^{-2}$ . c) Statistical histogram of a lifetime for rigid and flexible devices based on **M-Ir1** and **D-Ir2** under a constant current density of  $5 \text{ mA cm}^{-2}$ .

### Coordinates of all optimized geometrical structures

#### M-Ir1 in $S_0$ state

|   |             |             |             |
|---|-------------|-------------|-------------|
| N | -0.73041500 | -1.84002500 | 0.55315900  |
| N | -1.37314300 | 0.60391300  | -0.23080600 |
| N | -3.58269700 | 0.34740600  | -0.18935200 |
| C | -2.36987500 | -0.23848800 | 0.02053200  |
| C | -2.06277300 | -1.59953200 | 0.45792300  |
| C | -0.31247900 | -3.04894800 | 0.94050800  |
| H | 0.76186100  | -3.18625600 | 0.99981000  |
| C | -3.33822000 | 1.64661500  | -0.59695100 |
| C | -1.19127200 | -4.07747500 | 1.25646800  |
| H | -0.80050300 | -5.04043600 | 1.56627800  |
| C | -2.55561100 | -3.83786400 | 1.16608300  |
| H | -3.27408400 | -4.61507000 | 1.40604800  |
| C | -2.99996800 | -2.58424700 | 0.76165300  |
| H | -4.05935300 | -2.37873300 | 0.68567500  |
| C | -1.93909600 | 1.79681300  | -0.61913900 |
| C | -4.20916500 | 2.67945900  | -0.94190400 |
| H | -5.28578100 | 2.54666100  | -0.91955200 |
| C | -1.36264100 | 3.01461300  | -0.99952000 |

|    |             |             |             |
|----|-------------|-------------|-------------|
| H  | -0.28568400 | 3.13983900  | -1.02554200 |
| C  | -3.62399900 | 3.88001100  | -1.31393700 |
| H  | -4.25991100 | 4.71550400  | -1.59126000 |
| C  | -2.22444500 | 4.04398000  | -1.34265500 |
| H  | -1.81281500 | 5.00306000  | -1.64288300 |
| Ir | 0.60419700  | -0.19172400 | 0.07014800  |
| N  | 0.81937900  | -0.93364500 | -1.81458600 |
| N  | 0.62341900  | 0.60915500  | 1.94238300  |
| C  | 2.34294700  | -1.19549300 | 0.27786300  |
| C  | 1.70165700  | 1.46799300  | -0.26314000 |
| F  | 5.05586900  | -2.21464900 | 2.46314300  |
| F  | 3.52278300  | 3.51375500  | -2.64410600 |
| C  | 2.76696500  | -1.84998800 | -0.89848200 |
| F  | 4.30848700  | -3.23172700 | -2.04918000 |
| N  | 1.92934800  | -1.68069000 | -2.01887900 |
| C  | 2.27782700  | 1.90927600  | -1.45823600 |
| H  | 2.17888300  | 1.33940400  | -2.37716600 |
| C  | 3.14392300  | -1.33184700 | 1.41566000  |
| H  | 2.87935900  | -0.85151300 | 2.35287100  |
| C  | 1.88829000  | 2.26749600  | 0.88453700  |
| N  | 1.29942300  | 1.77480700  | 2.06613900  |
| C  | 2.98328000  | 3.10481300  | -1.48350300 |
| F  | 2.75024900  | 4.21328200  | 1.92383700  |
| C  | 0.16564400  | -0.87731000 | -2.97344000 |
| H  | -0.75843200 | -0.32238700 | -3.04907300 |
| C  | 3.93107400  | -2.60960600 | -0.91936400 |
| C  | 4.30233500  | -2.09551000 | 1.35720400  |
| C  | 4.72295200  | -2.74730300 | 0.20801800  |
| H  | 5.62918600  | -3.34122400 | 0.18309500  |
| C  | 3.15832900  | 3.90554800  | -0.36492200 |
| H  | 3.71120600  | 4.83680600  | -0.40486400 |
| C  | 0.15082900  | 0.29894300  | 3.14813700  |
| H  | -0.42434300 | -0.60507500 | 3.29002100  |
| C  | 2.59804800  | 3.46124400  | 0.82070300  |
| C  | 0.86611700  | -1.60142700 | -3.94582000 |
| H  | 0.59485400  | -1.74372900 | -4.98125500 |
| C  | 0.52878700  | 1.28291500  | 4.06986400  |
| H  | 0.30088400  | 1.31732900  | 5.12476300  |
| C  | 1.98382800  | -2.09852700 | -3.30446600 |
| H  | 2.79875600  | -2.70700600 | -3.66148800 |
| C  | 1.25907400  | 2.20657500  | 3.34789300  |
| H  | 1.74375100  | 3.12184200  | 3.64648800  |
| C  | -4.89600900 | -0.20619900 | -0.04948400 |
| C  | -5.56469300 | -0.07378400 | 1.16541100  |

|   |             |             |             |
|---|-------------|-------------|-------------|
| C | -5.49125600 | -0.82976900 | -1.14386000 |
| C | -6.84940000 | -0.59614400 | 1.28863600  |
| H | -5.07805400 | 0.42545400  | 1.99799300  |
| C | -6.77613500 | -1.34838800 | -1.00812500 |
| H | -4.94823400 | -0.90943500 | -2.08089700 |
| C | -7.45254800 | -1.23372800 | 0.20551900  |
| H | -7.37877500 | -0.50252200 | 2.23215000  |
| H | -7.24860800 | -1.84059100 | -1.85294100 |
| H | -8.45490300 | -1.63986800 | 0.30664100  |

**D-Ir2 in S<sub>0</sub> state**

|    |             |             |             |
|----|-------------|-------------|-------------|
| Ir | -6.49036631 | -0.32568448 | -0.02524645 |
| Ir | 6.49036055  | -0.32577828 | 0.02532092  |
| N  | 4.95324880  | 1.18221745  | 0.08516026  |
| N  | -4.95329884 | 1.18234768  | -0.08563403 |
| N  | -4.62188218 | -1.44169495 | -0.03091130 |
| N  | 4.62187282  | -1.44179114 | 0.03002257  |
| N  | -2.80336630 | 1.74820310  | -0.06580956 |
| N  | 6.59954304  | -0.09825273 | -1.99514814 |
| N  | 2.80333863  | 1.74808742  | 0.06445599  |
| N  | -6.62273678 | -0.59019340 | -2.04145830 |
| N  | 7.62633942  | 0.66350588  | -2.43808124 |
| N  | 7.42107458  | -1.60762573 | 2.44004041  |
| N  | 6.62205149  | -0.59037495 | 2.04155880  |
| N  | -6.59881061 | -0.09829343 | 1.99526899  |
| N  | -7.62549030 | 0.66334238  | 2.43867325  |
| N  | -7.42188607 | -1.60743937 | -2.43970283 |
| C  | -4.88357916 | 2.55700674  | -0.09686473 |
| C  | -3.47395602 | -0.71825202 | -0.05801607 |
| C  | -3.70670532 | 0.72532187  | -0.06685934 |
| C  | -3.11168661 | 4.25930482  | -0.09017024 |
| C  | 7.74327283  | -1.90559522 | 0.09731279  |
| C  | 3.70666525  | 0.72520465  | 0.06580218  |
| C  | 3.47391586  | -0.71836877 | 0.05652310  |
| C  | 3.52674152  | 2.92835784  | 0.08322536  |
| C  | -5.88553000 | 3.53431072  | -0.12184688 |
| C  | 4.88353956  | 2.55687930  | 0.09649153  |
| C  | -3.52677169 | 2.92847219  | -0.08415260 |
| C  | 8.46438261  | 1.19813948  | -1.43943022 |
| C  | -1.37485057 | 1.70614781  | -0.03318077 |
| C  | 8.93344771  | 1.34696794  | 0.91146213  |
| C  | 3.11166900  | 4.25919570  | 0.08927073  |
| C  | -3.34194060 | -3.46029027 | -0.04846180 |
| C  | -4.55100962 | -2.77614577 | -0.02589204 |

|   |              |             |             |
|---|--------------|-------------|-------------|
| C | 8.32971510   | -2.60396521 | -0.96246006 |
| C | 4.11526824   | 5.21562702  | 0.11228284  |
| C | 9.54636249   | 2.02863529  | -1.70862339 |
| C | 2.22707034   | -1.33872082 | 0.07953968  |
| C | -2.16354642  | -2.72734444 | -0.07889323 |
| C | -8.93384972  | 1.34703728  | -0.91032474 |
| C | 0.72332477   | 1.71631561  | -1.19969575 |
| C | 5.88549084   | 3.53416805  | 0.12206209  |
| C | 5.92849263   | -0.51517192 | -3.06720893 |
| C | 8.03579137   | -2.34296869 | 1.40685836  |
| C | 10.00894501  | 2.16971633  | 0.60458932  |
| C | -0.66652648  | 1.71729514  | -1.23275888 |
| C | 0.66649560   | 1.71638233  | 1.23132024  |
| C | 2.16349451   | -2.72745737 | 0.07574349  |
| C | 10.33999523  | 2.53257109  | -0.69222224 |
| C | -10.00933798 | 2.16962401  | -0.60298052 |
| C | -6.14201168  | -0.01499719 | -3.14221849 |
| C | -8.32928202  | -2.60399136 | 0.96307384  |
| C | -9.15965553  | -3.68586074 | 0.70134827  |
| C | -9.45121124  | -4.12408590 | -0.58129124 |
| C | -8.87294005  | -3.43037790 | -1.63071823 |
| C | -8.03618757  | -2.34287483 | -1.40633714 |
| C | -7.74323663  | -1.90554964 | -0.09687105 |
| C | 6.53338895   | -0.01387378 | -4.22618296 |
| C | 6.14090496   | -0.01525551 | 3.14217602  |
| C | -7.60977183  | 0.73115500  | 3.78988569  |
| C | 8.87251083   | -3.43044638 | 1.63148115  |
| C | 6.63789474   | -0.67296009 | 4.27389079  |
| C | 9.45118182   | -4.12407786 | 0.58222429  |
| C | -7.45082482  | -1.68036625 | -3.79024374 |
| C | -9.54596619  | 2.02828283  | 1.71005722  |
| C | 9.16004876   | -3.68580749 | -0.70049604 |
| C | 8.12559715   | 0.84866725  | -0.11508377 |
| C | 1.37482253   | 1.70608195  | 0.03173678  |
| C | -5.47844982  | 4.85875072  | -0.12909677 |
| C | 5.47842347   | 4.85861027  | 0.12932437  |
| C | -2.22712943  | -1.33860039 | -0.08217095 |
| C | -0.72334800  | 1.71546257  | 1.19825514  |
| C | -8.12559641  | 0.84869501  | 0.11588414  |
| C | 4.55100685   | -2.77624227 | 0.02458832  |
| C | 7.44952971   | -1.68062227 | 3.79058840  |
| C | -4.11528474  | 5.21575209  | -0.11260492 |
| C | -8.46395567  | 1.19798865  | 1.44038656  |
| C | 7.61125009   | 0.73129346  | -3.78930164 |

|   |              |             |             |
|---|--------------|-------------|-------------|
| C | -5.92720853  | -0.51512541 | 3.06702026  |
| C | -10.34000269 | 2.53225834  | 0.69398968  |
| C | 3.34191757   | -3.46038928 | 0.04601361  |
| C | -6.53162833  | -0.01389388 | 4.22627168  |
| C | -6.63939427  | -0.67265377 | -4.27378783 |
| H | 2.06075214   | 4.52879284  | 0.07800844  |
| H | 3.84420714   | 6.26713496  | 0.11850481  |
| H | 6.22802347   | 5.64416458  | 0.14944286  |
| H | 6.93446451   | 3.25940534  | 0.13867552  |
| H | 1.31881904   | -0.75170920 | 0.10532389  |
| H | 1.19909805   | -3.22546377 | 0.09787338  |
| H | 3.33920865   | -4.54485748 | 0.04157162  |
| H | 5.49820861   | -3.30432323 | 0.00132296  |
| H | 1.19973550   | 1.72322816  | 2.17653523  |
| H | -1.30023686  | 1.72204554  | 2.11747793  |
| H | -1.19976858  | 1.72480275  | -2.17796758 |
| H | 1.30021518   | 1.72350079  | -2.11891244 |
| H | -2.06076172  | 4.52888691  | -0.07932298 |
| H | -3.84421286  | 6.26725741  | -0.11879325 |
| H | -6.22805469  | 5.64431207  | -0.14876204 |
| H | -6.93451859  | 3.25957874  | -0.13802160 |
| H | -5.49819813  | -3.30422424 | -0.00204977 |
| H | -3.33923718  | -4.54475955 | -0.04435289 |
| H | -1.19915198  | -3.22531727 | -0.10194828 |
| H | -1.31889232  | -0.75158910 | -0.10845674 |
| H | -8.03473334  | -2.43030442 | -4.29845370 |
| H | -6.43600399  | -0.44402248 | -5.30930503 |
| H | -5.47709682  | 0.83340632  | -3.06591016 |
| H | -5.05908922  | -1.14835176 | 2.95090980  |
| H | -6.22494048  | -0.17356158 | 5.24921616  |
| H | -8.35330884  | 1.29269101  | 4.33172887  |
| H | 8.35497072   | 1.29291624  | -4.33079957 |
| H | 6.22718260   | -0.17356530 | -5.24926761 |
| H | 5.06039128   | -1.14850068 | -2.95151738 |
| H | 11.18245684  | 3.17807074  | -0.91169645 |
| H | 8.73313126   | 1.11240911  | 1.95249617  |
| H | 5.47598417   | 0.83312521  | 3.06566740  |
| H | 6.43412319   | -0.44439037 | 5.30934652  |
| H | 8.03325916   | -2.43058722 | 4.29896452  |
| H | 10.10197130  | -4.97087863 | 0.76664780  |
| H | 8.15032994   | -2.31861707 | -1.99472583 |
| H | -8.73387152  | 1.11261800  | -1.95145528 |
| H | -11.18248070 | 3.17760831  | 0.91384133  |
| H | -10.10203088 | -4.97090343 | -0.76552912 |

|   |              |             |             |
|---|--------------|-------------|-------------|
| H | -8.14955898  | -2.31867230 | 1.99528856  |
| F | -9.71023646  | -4.34439448 | 1.73484760  |
| F | -9.13542255  | -3.83091393 | -2.88619786 |
| F | -10.76862986 | 2.64383216  | -1.60476451 |
| F | -9.83917717  | 2.36097963  | 2.97838585  |
| F | 9.71101912   | -4.34426700 | -1.73383517 |
| F | 9.13455644   | -3.83103875 | 2.88703522  |
| F | 10.76784233  | 2.64388090  | 1.60669138  |
| F | 9.83993484   | 2.36158029  | -2.97680376 |

**M-Ir1 in MC state**

|    |             |             |             |
|----|-------------|-------------|-------------|
| Ir | 0.48613000  | -0.22969600 | 0.08384400  |
| N  | 1.23014400  | 2.33763500  | 1.77719600  |
| C  | 1.68339000  | 1.36953500  | -0.38893300 |
| N  | 1.20618800  | -1.78681400 | -1.90040800 |
| N  | 0.23301900  | 1.44213100  | 1.89276200  |
| C  | 2.28845300  | 1.47893800  | -1.64690100 |
| H  | 2.18431200  | 0.69459700  | -2.39068700 |
| C  | 3.00838100  | -1.87221200 | -0.37334800 |
| C  | 0.54293300  | 2.47664500  | 3.86279000  |
| H  | 0.43204400  | 2.76869600  | 4.89701400  |
| C  | -0.18718300 | 1.51140500  | 3.15327700  |
| H  | -0.99255500 | 0.87189000  | 3.48986600  |
| N  | 2.52150500  | -1.98624300 | -1.69550500 |
| C  | 2.28027500  | -1.11031900 | 0.55800100  |
| C  | 2.61631600  | 3.54468300  | 0.15525100  |
| C  | 3.21781300  | 3.65600500  | -1.08576000 |
| H  | 3.79743100  | 4.53403200  | -1.34627700 |
| C  | 3.17533000  | -2.21585100 | -2.86214000 |
| H  | 4.23920500  | -2.39037300 | -2.89016600 |
| C  | 4.17835400  | -2.52217000 | 0.02109900  |
| C  | 3.03277500  | 2.60461400  | -1.96831500 |
| C  | 1.86782100  | 2.42664600  | 0.52074000  |
| C  | 2.23364700  | -2.16120700 | -3.86949700 |
| H  | 2.40298800  | -2.30472000 | -4.92692800 |
| F  | 4.84876300  | -3.27777700 | -0.86470900 |
| F  | 2.75814600  | 4.56416600  | 1.01929000  |
| F  | 3.60161700  | 2.68319500  | -3.18242000 |
| F  | 4.41771200  | -1.55374000 | 3.46446700  |
| C  | 3.95593800  | -1.66672000 | 2.20863400  |
| C  | 4.68031000  | -2.42863100 | 1.30667000  |
| H  | 5.59442100  | -2.93991800 | 1.58566400  |
| C  | 2.78091700  | -1.01545200 | 1.86321500  |
| H  | 2.26739900  | -0.42854400 | 2.61958200  |

|   |             |             |             |
|---|-------------|-------------|-------------|
| C | 1.44500900  | 2.98457200  | 2.94890800  |
| H | 2.20960400  | 3.73824000  | 3.04729100  |
| C | 1.02260000  | -1.88504500 | -3.21441300 |
| H | 0.03111200  | -1.76054000 | -3.63016600 |
| N | -0.86849500 | -1.92337800 | 0.45194000  |
| N | -1.49011100 | 0.50913400  | -0.40123600 |
| N | -3.69909400 | 0.25896900  | -0.33512300 |
| C | -2.48903100 | -0.33833000 | -0.16362800 |
| C | -2.18832000 | -1.71348100 | 0.22728700  |
| C | -0.44744300 | -3.14032800 | 0.80906800  |
| H | 0.61901700  | -3.24808200 | 0.97582900  |
| C | -3.45499400 | 1.56754500  | -0.71927700 |
| C | -1.31655700 | -4.21298700 | 0.95614800  |
| H | -0.92919700 | -5.18193800 | 1.25103500  |
| C | -2.66876600 | -4.01175100 | 0.70975200  |
| H | -3.37706600 | -4.82912700 | 0.80085800  |
| C | -3.11443300 | -2.74853200 | 0.33869600  |
| H | -4.16253300 | -2.57762800 | 0.13146900  |
| C | -2.05659900 | 1.71217700  | -0.75824700 |
| C | -4.32596500 | 2.61393600  | -1.01804300 |
| H | -5.40273800 | 2.48644700  | -0.97977500 |
| C | -1.47877600 | 2.93475700  | -1.11665000 |
| H | -0.40151600 | 3.05452000  | -1.15731700 |
| C | -3.73976100 | 3.82083000  | -1.36839400 |
| H | -4.37546700 | 4.66682800  | -1.61215400 |
| C | -2.34027800 | 3.97760000  | -1.41851400 |
| H | -1.92834200 | 4.94162400  | -1.70177900 |
| C | -5.00658000 | -0.26851500 | -0.08338800 |
| C | -5.46854800 | -0.34407800 | 1.22920300  |
| C | -5.79890500 | -0.66468800 | -1.15817100 |
| C | -6.74361900 | -0.84873700 | 1.46723700  |
| H | -4.83292600 | -0.01583300 | 2.04634100  |
| C | -7.07502800 | -1.16257100 | -0.90692500 |
| H | -5.41349600 | -0.59013300 | -2.17057900 |
| C | -7.54452600 | -1.25822100 | 0.40206800  |
| H | -7.11169800 | -0.91762300 | 2.48657300  |
| H | -7.70063200 | -1.47821900 | -1.73648700 |
| H | -8.53927900 | -1.65060400 | 0.59279100  |

**D-Ir2 in MC state**

|    |             |             |             |
|----|-------------|-------------|-------------|
| Ir | -6.55695500 | -0.31804000 | -0.03283200 |
| N  | -7.98066200 | 1.20534500  | -2.02948500 |
| C  | -8.17390600 | 0.83746100  | 0.31691700  |
| N  | -6.43666900 | -1.04710600 | 1.86663600  |



|   |              |             |             |
|---|--------------|-------------|-------------|
| N | -6.91869900  | 0.37494100  | -1.91249400 |
| C | -8.83403200  | 1.07203900  | 1.52675700  |
| H | -8.50381400  | 0.60531000  | 2.44981200  |
| C | -7.94225500  | -2.62682000 | 1.02443200  |
| C | -7.13375800  | 0.98464400  | -4.05051000 |
| H | -6.96144200  | 1.07538900  | -5.11260500 |
| C | -6.39546400  | 0.23244800  | -3.12875900 |
| H | -5.52988100  | -0.39747600 | -3.27696400 |
| N | -7.19296500  | -2.14169200 | 2.11470500  |
| C | -7.81766400  | -1.88739100 | -0.17113400 |
| C | -9.77254000  | 2.33060500  | -0.76266100 |
| C | -10.41993100 | 2.57304400  | 0.43697600  |
| H | -11.27500600 | 3.23738500  | 0.48387000  |
| C | -7.05733000  | -2.52333000 | 3.40545900  |
| H | -7.58525200  | -3.37848800 | 3.79515500  |
| C | -8.74811400  | -3.75776700 | 1.08989100  |
| C | -9.92804900  | 1.92628700  | 1.56069000  |
| C | -8.67574400  | 1.47943500  | -0.83499400 |
| C | -6.18023100  | -1.64056600 | 4.00492400  |
| H | -5.84835500  | -1.65262300 | 5.03231800  |
| F | -8.84284600  | -4.45135600 | 2.23680200  |
| F | -10.22516300 | 2.94100100  | -1.87086400 |
| F | -10.54356000 | 2.14363900  | 2.73501600  |
| F | -10.02837300 | -3.86936500 | -2.25846000 |
| C | -9.34144200  | -3.46090400 | -1.17856300 |
| C | -9.46448400  | -4.19739700 | -0.01033000 |
| H | -10.09090300 | -5.07982100 | 0.04934400  |
| C | -8.54364200  | -2.32887300 | -1.28145900 |
| H | -8.49696500  | -1.80480400 | -2.23126200 |
| C | -8.13533000  | 1.59047700  | -3.31721000 |
| H | -8.93195800  | 2.25417000  | -3.61140600 |
| C | -5.81750200  | -0.73236900 | 3.00290600  |
| H | -5.15732000  | 0.12227200  | 3.04240700  |
| N | -4.72893200  | -1.38996700 | -0.52182600 |
| N | -4.99089600  | 1.14711900  | 0.17812500  |
| N | -2.84326800  | 1.70878700  | 0.04971400  |
| C | -3.76424900  | 0.71025500  | -0.08320800 |
| C | -3.56754200  | -0.69130900 | -0.45199800 |
| C | -4.69309300  | -2.68343400 | -0.85564100 |
| H | -5.65028500  | -3.19195300 | -0.89735300 |
| C | -3.53362200  | 2.85063200  | 0.41961100  |
| C | -3.50721500  | -3.34952500 | -1.13837400 |
| H | -3.53277800  | -4.39967300 | -1.40747400 |
| C | -2.31448400  | -2.64362300 | -1.06335600 |

|    |             |             |             |
|----|-------------|-------------|-------------|
| H  | -1.36705100 | -3.12946600 | -1.27472800 |
| C  | -2.34166300 | -1.29823100 | -0.71413500 |
| H  | -1.42090700 | -0.73483100 | -0.64687500 |
| C  | -4.88917400 | 2.48241000  | 0.49631800  |
| C  | -3.09068600 | 4.14571700  | 0.68449400  |
| H  | -2.04126900 | 4.41376800  | 0.62030000  |
| C  | -5.86018100 | 3.42481300  | 0.85501400  |
| H  | -6.90720300 | 3.15090600  | 0.92349600  |
| C  | -4.06402100 | 5.06841300  | 1.03615200  |
| H  | -3.77007300 | 6.09107700  | 1.25285300  |
| C  | -5.42510900 | 4.71322000  | 1.12069000  |
| H  | -6.15023900 | 5.47082400  | 1.40252100  |
| Ir | 6.41332900  | -0.29555700 | 0.01533000  |
| N  | 7.88532000  | 1.51306000  | 2.15870000  |
| C  | 8.11676900  | 0.83180700  | -0.15102900 |
| N  | 6.67282000  | -1.87962900 | -2.10469800 |
| N  | 6.64113900  | 1.00146800  | 2.12417500  |
| C  | 8.80683700  | 0.92318100  | -1.36542400 |
| H  | 8.49349200  | 0.35000300  | -2.23332900 |
| C  | 8.24326600  | -2.66163800 | -0.51495900 |
| C  | 7.17941000  | 1.51439700  | 4.24347500  |
| H  | 7.12051300  | 1.64480000  | 5.31429900  |
| C  | 6.20457000  | 0.99186200  | 3.38085000  |
| H  | 5.21526800  | 0.61588100  | 3.60592700  |
| N  | 7.85794500  | -2.47168200 | -1.86195100 |
| C  | 7.74781900  | -1.78865000 | 0.47119800  |
| C  | 9.69356000  | 2.42523600  | 0.77605600  |
| C  | 10.37809000 | 2.52247200  | -0.42242000 |
| H  | 11.23783100 | 3.17522600  | -0.51954600 |
| C  | 8.52487300  | -2.74054200 | -3.01181400 |
| H  | 9.49615700  | -3.20978600 | -3.00539900 |
| C  | 9.07876700  | -3.71991100 | -0.15664700 |
| C  | 9.90955400  | 1.75728800  | -1.47789500 |
| C  | 8.58723600  | 1.59127500  | 0.93518800  |
| C  | 7.73048800  | -2.29974200 | -4.05078500 |
| H  | 7.94767400  | -2.36035300 | -5.10747300 |
| F  | 9.51519600  | -4.56772400 | -1.10285100 |
| F  | 10.11715100 | 3.17617800  | 1.80672800  |
| F  | 10.55436600 | 1.82907900  | -2.65342400 |
| F  | 9.34265300  | -3.25955300 | 3.38764000  |
| C  | 8.98123100  | -3.07134800 | 2.10813700  |
| C  | 9.47313300  | -3.94262400 | 1.15036700  |
| H  | 10.12664600 | -4.76960100 | 1.40274200  |
| C  | 8.13676900  | -2.01531400 | 1.79827400  |

|   |             |             |             |
|---|-------------|-------------|-------------|
| H | 7.79254900  | -1.37176100 | 2.60254900  |
| C | 8.24446900  | 1.83588200  | 3.42547700  |
| H | 9.21092300  | 2.25746800  | 3.64981700  |
| C | 6.59114800  | -1.76443500 | -3.42812500 |
| H | 5.71629000  | -1.31098600 | -3.87586200 |
| N | 4.52335500  | -1.42367500 | 0.11164600  |
| N | 4.88355500  | 1.14328100  | -0.47769400 |
| N | 2.73270200  | 1.69953400  | -0.55935500 |
| C | 3.63411700  | 0.69145000  | -0.40094200 |
| C | 3.39413200  | -0.73263000 | -0.17661200 |
| C | 4.45063400  | -2.73757400 | 0.34090300  |
| H | 5.38671200  | -3.23726300 | 0.56650500  |
| C | 3.45677400  | 2.86557800  | -0.76486700 |
| C | 3.25061500  | -3.43425000 | 0.28726900  |
| H | 3.23845600  | -4.50019200 | 0.48584700  |
| C | 2.09234500  | -2.73965000 | -0.03728800 |
| H | 1.13947700  | -3.25447700 | -0.10818500 |
| C | 2.16061200  | -1.37196600 | -0.27624000 |
| H | 1.27123800  | -0.81853800 | -0.54743400 |
| C | 4.81307900  | 2.49922200  | -0.71062800 |
| C | 3.04320300  | 4.18018600  | -0.97217100 |
| H | 1.99274900  | 4.44951400  | -1.00581700 |
| C | 5.81629300  | 3.45917500  | -0.88004800 |
| H | 6.86509100  | 3.18491800  | -0.84721100 |
| C | 4.04793100  | 5.12201800  | -1.13604400 |
| H | 3.77704000  | 6.16019100  | -1.30313900 |
| C | 5.41051600  | 4.76708700  | -1.09267700 |
| H | 6.16075200  | 5.54016400  | -1.22923300 |
| C | 1.31140200  | 1.66878000  | -0.41148900 |
| C | 0.76369200  | 1.53626700  | 0.86288000  |
| C | 0.50669900  | 1.82383900  | -1.53799800 |
| C | -0.61786600 | 1.52966200  | 1.00965500  |
| H | 1.41239700  | 1.43727800  | 1.72725800  |
| C | -0.87594800 | 1.83467200  | -1.38810600 |
| H | 0.95876300  | 1.93502300  | -2.51834800 |
| C | -1.42414700 | 1.67248300  | -0.11774600 |
| H | -1.07016900 | 1.42057300  | 1.99021700  |
| H | -1.52558600 | 1.95784900  | -2.24869500 |

**M-Ir1 in T<sub>1</sub> state**

|   |             |             |             |
|---|-------------|-------------|-------------|
| N | -0.72568600 | -1.80662800 | 0.64953500  |
| N | -1.31995300 | 0.65397000  | -0.18128700 |
| N | -3.57849000 | 0.38450800  | -0.14297800 |
| C | -2.38469000 | -0.25563400 | 0.08949900  |

|    |             |             |             |
|----|-------------|-------------|-------------|
| C  | -2.09076500 | -1.54102300 | 0.53282300  |
| C  | -0.33282100 | -3.00673700 | 1.06652800  |
| H  | 0.74057700  | -3.15506500 | 1.13724200  |
| C  | -3.29685300 | 1.68810000  | -0.54447800 |
| C  | -1.21562300 | -4.02879400 | 1.40434200  |
| H  | -0.82889700 | -4.98432600 | 1.73901500  |
| C  | -2.59899100 | -3.78122400 | 1.30020000  |
| H  | -3.31597900 | -4.55444900 | 1.55868900  |
| C  | -3.03962000 | -2.55595600 | 0.87033100  |
| H  | -4.09900800 | -2.34946200 | 0.78758200  |
| C  | -1.87563500 | 1.81700300  | -0.55495900 |
| C  | -4.12725100 | 2.72429600  | -0.88241100 |
| H  | -5.20690300 | 2.62215700  | -0.87040900 |
| C  | -1.27746800 | 3.04283900  | -0.92423800 |
| H  | -0.19864400 | 3.14488000  | -0.94086000 |
| C  | -3.50925100 | 3.94418900  | -1.24935600 |
| H  | -4.13960900 | 4.78453200  | -1.52359700 |
| C  | -2.11783400 | 4.09419800  | -1.26778100 |
| H  | -1.68894900 | 5.04835300  | -1.55645200 |
| Ir | 0.57783800  | -0.17946900 | 0.09358000  |
| N  | 0.69831200  | -0.96609800 | -1.78796200 |
| N  | 0.71877000  | 0.61997800  | 1.95273900  |
| C  | 2.31201800  | -1.22496400 | 0.23924400  |
| C  | 1.71033800  | 1.45276900  | -0.30516700 |
| F  | 5.10217600  | -2.25419900 | 2.31619400  |
| F  | 3.47618100  | 3.44064200  | -2.77279300 |
| C  | 2.66736400  | -1.90557400 | -0.94264400 |
| F  | 4.13386900  | -3.32867500 | -2.14000600 |
| N  | 1.78133600  | -1.74032800 | -2.02591000 |
| C  | 2.23622200  | 1.87738300  | -1.52810000 |
| H  | 2.06458700  | 1.31722400  | -2.44239800 |
| C  | 3.16003700  | -1.35489600 | 1.34211300  |
| H  | 2.94659600  | -0.85524200 | 2.28218000  |
| C  | 1.98871700  | 2.23664200  | 0.83333300  |
| N  | 1.44548600  | 1.75908400  | 2.04339900  |
| C  | 2.98527400  | 3.04525600  | -1.58681000 |
| F  | 2.98261200  | 4.13962900  | 1.83344200  |
| C  | -0.01075800 | -0.92284600 | -2.91449500 |
| H  | -0.92607300 | -0.35043300 | -2.95928600 |
| C  | 3.81784800  | -2.68417500 | -1.00454400 |
| C  | 4.30146700  | -2.14002800 | 1.24410300  |
| C  | 4.65761500  | -2.81700700 | 0.08793700  |
| H  | 5.55222600  | -3.42626000 | 0.03147200  |
| C  | 3.25185100  | 3.83129700  | -0.47579400 |

|   |             |             |             |
|---|-------------|-------------|-------------|
| H | 3.83784000  | 4.74058900  | -0.54225200 |
| C | 0.29812100  | 0.32028600  | 3.18169900  |
| H | -0.30339300 | -0.56185700 | 3.34908100  |
| C | 2.74048200  | 3.40233300  | 0.73708400  |
| C | 0.62659800  | -1.68508700 | -3.90036700 |
| H | 0.30244500  | -1.84607300 | -4.91767000 |
| C | 0.76082300  | 1.28386800  | 4.08306600  |
| H | 0.58930200  | 1.32274600  | 5.14839700  |
| C | 1.76385700  | -2.19041600 | -3.30131300 |
| H | 2.54747800  | -2.82542100 | -3.68117100 |
| C | 1.48753200  | 2.18403800  | 3.32557100  |
| H | 2.01998700  | 3.07960800  | 3.60190700  |
| C | -4.90201600 | -0.14081800 | -0.04204300 |
| C | -5.62276700 | 0.04421500  | 1.13668100  |
| C | -5.46154600 | -0.80251900 | -1.13418600 |
| C | -6.91903000 | -0.45654300 | 1.22526200  |
| H | -5.16487800 | 0.56773400  | 1.97081200  |
| C | -6.75754200 | -1.30120800 | -1.03412400 |
| H | -4.88152200 | -0.92617700 | -2.04405300 |
| C | -7.48421900 | -1.12986000 | 0.14331900  |
| H | -7.48637100 | -0.32031400 | 2.14124700  |
| H | -7.19997100 | -1.82177100 | -1.87836300 |
| H | -8.49525200 | -1.52023200 | 0.21701800  |

**D-Ir2 in T<sub>1</sub> state**

|    |             |             |             |
|----|-------------|-------------|-------------|
| Ir | 6.46532755  | -0.33319310 | -0.00602823 |
| Ir | -6.49755328 | -0.26243884 | -0.09245706 |
| N  | -4.90595464 | 1.17383566  | 0.11950654  |
| N  | 5.01774680  | 1.09536926  | -0.48894363 |
| N  | 4.67223189  | -1.52650173 | -0.17542877 |
| N  | -4.72974599 | -1.28421870 | -0.84449883 |
| N  | 2.80922441  | 1.59484985  | -0.77774070 |
| N  | -6.23723268 | -0.79961189 | 1.85466175  |
| N  | -2.74940350 | 1.69746117  | -0.02694472 |
| N  | 6.16075980  | -0.21708236 | 2.01186762  |
| N  | -7.12290850 | -0.26394058 | 2.72611080  |
| N  | -7.91751417 | -0.55817066 | -2.58883914 |
| N  | -6.99875224 | 0.24340088  | -2.00097007 |
| N  | 7.01751332  | -0.51359170 | -1.94863525 |
| N  | 8.13658943  | 0.16265457  | -2.30189467 |
| N  | 6.84201878  | -1.11858652 | 2.75490261  |
| C  | 4.92845439  | 2.40618974  | -0.76219258 |
| C  | 3.51114938  | -0.81330553 | -0.45939101 |
| C  | 3.69552497  | 0.56530042  | -0.53957519 |

|   |             |             |             |
|---|-------------|-------------|-------------|
| C | 3.17989635  | 4.05874306  | -1.20040178 |
| C | -7.83472646 | -1.71568875 | -0.50684973 |
| C | -3.70327753 | 0.74743603  | -0.24849327 |
| C | -3.56159608 | -0.59394777 | -0.81259760 |
| C | -3.39190669 | 2.79690394  | 0.51661435  |
| C | 5.94249842  | 3.38538745  | -0.85933138 |
| C | -4.75360472 | 2.45352487  | 0.60294756  |
| C | 3.56044113  | 2.76733984  | -0.94569977 |
| C | -8.09230375 | 0.59015025  | 2.16384407  |
| C | 1.40278421  | 1.58637430  | -0.59607156 |
| C | -8.95820204 | 1.59109038  | 0.15978674  |
| C | -2.90191976 | 4.03403690  | 0.93272407  |
| C | 3.43208215  | -3.57681060 | -0.21899073 |
| C | 4.60872196  | -2.84931528 | -0.05731869 |
| C | -8.26008045 | -2.76996212 | 0.30684559  |
| C | -3.83463773 | 4.92629663  | 1.43923672  |
| C | -9.06521803 | 1.24348921  | 2.91163843  |
| C | -2.37794277 | -1.15115076 | -1.28969035 |
| C | 2.25541462  | -2.88071977 | -0.54892773 |
| C | 8.67677055  | 1.57358158  | 1.03096760  |
| C | -0.51908221 | 1.15334272  | 0.78708449  |
| C | -5.68395390 | 3.36590643  | 1.11435518  |
| C | -5.41267134 | -1.57333986 | 2.55823601  |
| C | -8.37861303 | -1.63587245 | -1.80675314 |
| C | -9.91694871 | 2.22552769  | 0.93826405  |
| C | 0.85733281  | 1.13329590  | 0.60816779  |
| C | -0.79648742 | 2.10685549  | -1.42832794 |
| C | -2.39730562 | -2.44358676 | -1.80144480 |
| C | -9.99610436 | 2.07647749  | 2.31465604  |
| C | 9.81237249  | 2.34026777  | 0.80438443  |
| C | 5.46644893  | 0.54506964  | 2.85509401  |
| C | 8.46395689  | -2.69988986 | -0.12025134 |
| C | 9.19976711  | -3.69264567 | 0.51393456  |
| C | 9.19018927  | -3.88142736 | 1.88718508  |
| C | 8.40325174  | -3.02370979 | 2.63627521  |
| C | 7.65564668  | -2.01675300 | 2.03546801  |
| C | 7.66769097  | -1.83738990 | 0.63756224  |
| C | -5.77198243 | -1.53728852 | 3.91105618  |
| C | -6.69252816 | 1.19784668  | -2.87780125 |
| C | 8.41763282  | -0.05088787 | -3.60607666 |
| C | -9.29626433 | -2.57612730 | -2.26118906 |
| C | -7.42667518 | 1.00993507  | -4.05513587 |
| C | -9.71552173 | -3.62215993 | -1.45681090 |
| C | 6.58256947  | -0.93300690 | 4.06938935  |

|   |             |             |             |
|---|-------------|-------------|-------------|
| C | 9.87993514  | 1.69589867  | -1.46912094 |
| C | -9.17951089 | -3.68987062 | -0.17993302 |
| C | -8.01095407 | 0.75993058  | 0.76542177  |
| C | -1.33614684 | 1.63562018  | -0.23435093 |
| C | 5.55758854  | 4.69128107  | -1.12954780 |
| C | -5.20223603 | 4.59779065  | 1.52722243  |
| C | 2.28528214  | -1.51338948 | -0.67038048 |
| C | 0.58062527  | 2.07117782  | -1.61476979 |
| C | 8.11148886  | 0.84741918  | -0.02007289 |
| C | -4.73912190 | -2.52617486 | -1.33801009 |
| C | -8.19659622 | -0.11573793 | -3.83640734 |
| C | 4.20894901  | 5.02607751  | -1.29293077 |
| C | 8.74515327  | 0.91564721  | -1.27773503 |
| C | -6.86434852 | -0.69492138 | 3.98227625  |
| C | 6.58651390  | -1.15893706 | -3.03273956 |
| C | 10.43503228 | 2.42565043  | -0.43178377 |
| C | -3.59452069 | -3.14568676 | -1.82432635 |
| C | 7.44247409  | -0.89454884 | -4.10606068 |
| C | 5.70237249  | 0.12664265  | 4.16953541  |
| H | -1.84813905 | 4.28279464  | 0.86185259  |
| H | -3.50300506 | 5.90399564  | 1.77601838  |
| H | -5.89514034 | 5.33101728  | 1.92921796  |
| H | -6.73671610 | 3.11352381  | 1.17963063  |
| H | -1.45605500 | -0.58592349 | -1.26860826 |
| H | -1.48308650 | -2.89052673 | -2.17901729 |
| H | -3.65584185 | -4.15611072 | -2.21321784 |
| H | -5.69825031 | -3.03276261 | -1.33753337 |
| H | -1.45004859 | 2.48145743  | -2.20975360 |
| H | 1.01594942  | 2.41024329  | -2.54922894 |
| H | 1.50757546  | 0.77358752  | 1.39950381  |
| H | -0.96003279 | 0.80870729  | 1.71714669  |
| H | 2.14092697  | 4.34289220  | -1.32417136 |
| H | 3.93493993  | 6.05679928  | -1.49535073 |
| H | 6.31329599  | 5.46566453  | -1.21281818 |
| H | 6.98194758  | 3.11374813  | -0.71774129 |
| H | 5.54520765  | -3.35076984 | 0.16725687  |
| H | 3.44691048  | -4.65458019 | -0.10603315 |
| H | 1.32707707  | -3.41888960 | -0.71519614 |
| H | 1.39312493  | -0.96655422 | -0.94697504 |
| H | 7.03534189  | -1.55585764 | 4.82345130  |
| H | 5.28755555  | 0.54277145  | 5.07537864  |
| H | 4.84771544  | 1.34776246  | 2.48035170  |
| H | 5.69808187  | -1.77220761 | -2.98138921 |
| H | 7.36430397  | -1.26773679 | -5.11624686 |

|   |              |             |             |
|---|--------------|-------------|-------------|
| H | 9.27403343   | 0.40463377  | -4.07611830 |
| H | -7.46507371  | -0.37610025 | 4.81857581  |
| H | -5.29867725  | -2.05679762 | 4.73080026  |
| H | -4.61720455  | -2.11086625 | 2.06188838  |
| H | -10.75229765 | 2.58052218  | 2.90517893  |
| H | -8.95792438  | 1.76093347  | -0.91256686 |
| H | -5.97498339  | 1.96317372  | -2.61907618 |
| H | -7.40186788  | 1.61537512  | -4.94886554 |
| H | -8.90921732  | -0.62464501 | -4.46486440 |
| H | -10.43140546 | -4.35070102 | -1.81931123 |
| H | -7.88506524  | -2.88871886 | 1.31896873  |
| H | 8.24254654   | 1.56022850  | 2.02609583  |
| H | 11.32053744  | 3.03061780  | -0.58856584 |
| H | 9.76986654   | -4.66342380 | 2.36376568  |
| H | 8.52112206   | -2.61551614 | -1.20121604 |
| F | 9.95718406   | -4.51272616 | -0.23225472 |
| F | 8.36983753   | -3.18255324 | 3.96940158  |
| F | 10.33669178  | 3.03752504  | 1.82531829  |
| F | 10.45897136  | 1.75538398  | -2.67951081 |
| F | -9.57245072  | -4.69680067 | 0.61802245  |
| F | -9.79482444  | -2.48348259 | -3.50555211 |
| F | -10.81336190 | 3.02542078  | 0.33685227  |
| F | -9.11613589  | 1.07448965  | 4.24372142  |
